# Supplementary material for: Noisy qudit vs multiple qubits: conditions on gate efficiency for enhancing fidelity
Source: Springer Nature journal article supplement (doi:10.1038/s41534-024-00829-6), 2024-06-10
Supplement: 41534_2024_829_MOESM1_ESM.pdf [file 41534_2024_829_MOESM1_ESM.pdf]

## Supplementary Notes

### Noisy Qudit vs Multiple Qubits: Conditions on Gate Efficiency for Enhancing Fidelity

Denis Janković<sup>1,2\*</sup>, Jean-Gabriel Hartmann<sup>1</sup>, Mario Ruben<sup>2,3,4</sup>,  
Paul-Antoine Hervieux<sup>1</sup>

<sup>1</sup>Institut de Physique et Chimie des Matériaux de Strasbourg (IPCMS), UMR 7504, Université de Strasbourg, CNRS, 23, Rue du Loess, 67000 Strasbourg, France.

<sup>2</sup>Institute of Nanotechnology (INT), Karlsruhe Institute of Technology, P.O. Box 3640, 76021 Karlsruhe, Germany.

<sup>3</sup>Institute for Quantum Materials and Technologies (IQMT), Karlsruhe Institute of Technology, P.O. Box 3640, 76021 Karlsruhe, Germany.

<sup>4</sup>Centre Européen de Sciences Quantiques (CESQ), Institut de Science et d'Ingénierie Supramoléculaires (ISIS), Université de Strasbourg, 8, Allée Gaspard Monge, 67000 Strasbourg, France.

\*Corresponding author(s). E-mail(s): [denis.jankovic@ipcms.unistra.fr](mailto:denis.jankovic@ipcms.unistra.fr);  
Contributing authors: [jean-gabriel.hartmann@ipcms.unistra.fr](mailto:jean-gabriel.hartmann@ipcms.unistra.fr);  
[mario.ruben@kit.edu](mailto:mario.ruben@kit.edu); [hervieux@unistra.fr](mailto:hervieux@unistra.fr);

## Supplementary Notes 1 : Complementary Derivations

### Supplementary Notes 1a : Fluctuation-dissipation relation

Substituting, from the article, (3) and (2) into (6) and (5) leads to

$$\mathcal{E}(\rho^*) = \gamma \left( \frac{1}{2} \text{Tr}(\rho^* \{L^\dagger L, \rho^*\}) - \text{Tr}(\rho^* L \rho^* L^\dagger) \right) + \mathcal{O}((\gamma)^2). \quad (1)$$

The trace being invariant by cyclic permutations and  $\rho^{*2} = \rho^*$  leads to the simplification

$$\frac{1}{2} \text{Tr}(\rho^* \{L^\dagger L, \rho^*\}) = \text{Tr}(\rho^* L^\dagger L) \equiv \langle L^\dagger L \rangle_*. \quad (2)$$

Moreover

$$\text{Tr}(\rho^* L \rho^* L^\dagger) = \text{Tr}(|\varphi^*\rangle \langle \varphi^*| L |\varphi^*\rangle \langle \varphi^*| L^\dagger) \quad (3)$$

$$= \langle L \rangle_* \text{Tr}(\rho^* L^\dagger) \quad (4)$$

$$= \langle L^\dagger \rangle_* \langle L \rangle_* . \quad (5)$$

Accounting for the above results, one finally obtains

$$\mathcal{E}(\rho^*) = \gamma t \left( \langle L^\dagger L \rangle_* - \langle L^\dagger \rangle_* \langle L \rangle_* \right) + \mathcal{O}((\gamma t)^2), \quad (6)$$

which can be rewritten as (7) from the article.

### Supplementary Notes 1b : Average Gate Infidelity for the Pure Dephasing Channel of one qudit

In a trivial way we have  $\text{Tr}(E_1) \propto \text{Tr}(J_z) = 0$ , and

$$\begin{aligned} \text{Tr}(E_0) &= d - \frac{\gamma t}{2} \text{Tr}(J_z^2) \\ &= d - \frac{\gamma t}{2} \sum_{k=0}^{d-1} \left( \frac{d-1-2k}{2} \right)^2 \\ &= d - \frac{\gamma t}{8} \left[ d(d-1)^2 - 4(d-1) \sum_{k=0}^{d-1} k + 4 \sum_{k=0}^{d-1} k^2 \right] \\ &= d - \frac{\gamma t}{8} \left[ d(d-1)^2 - 2d(d-1)^2 + 4 \frac{d(d-1)(2d-1)}{6} \right] \\ &= d - \frac{\gamma t}{24} d(d^2 - 1), \end{aligned}$$

which results in

$$|\text{Tr}(E_0)|^2 = d^2 - \frac{\gamma t}{12} d^2 (d^2 - 1) + \mathcal{O}((\gamma t)^2). \quad (7)$$

Therefore

$$\overline{\mathcal{F}}(\mathcal{E}_z) = \frac{d + d^2 - \frac{\gamma t}{12} d^2 (d^2 - 1)}{d(d+1)} + \mathcal{O}((\gamma t)^2) = 1 - \frac{\gamma t}{12} d(d-1) + \mathcal{O}((\gamma t)^2), \quad (8)$$

which leads to the simplified expression (13) from the article.

Moreover, this is the origin of the factor  $\frac{1}{12}$  in (14) from the article whose ratio with the  $\frac{1}{4}$  obtained in (20) from the article and (10) leads to the non-trivial factor  $\frac{1}{3}$  in (22) from the article.

### Supplementary Notes 1c : Average Gate Infidelity for the pure dephasing channel of $n$ qubits

Since  $\text{Tr}(E_k) = 0 \forall k \neq 0$ , only  $\text{Tr}(E_0)$  is left and is given by

$$\begin{aligned} \text{Tr}(E_0) &= 2^n - \frac{\gamma^t}{2} \sum_{k=1}^n \left[ \text{Tr} \left( S_z^{2^{(k)}} \right) \prod_{j \neq k} \text{Tr} \left( \mathbb{1}_2^{(j)} \right) \right] \\ &= 2^n - n \frac{\gamma^t}{8} 2^n, \end{aligned} \quad (9)$$

leading to

$$|\text{Tr}(E_0)|^2 = 2^{2n} - \frac{\gamma^t}{4} n 2^{2n} + \mathcal{O}((\gamma^t)^2), \quad (10)$$

which allows to obtain (20) from the article using (10) from the article.

### Supplementary Notes 1d : Average over the Fubini-Study measure of the uncertainty of $L$

First, rewriting  $\int d\rho \text{Tr}(\rho M^\dagger M)$  yields

$$\int dU \text{Tr}(U \rho U^\dagger M^\dagger M) = \text{Tr} \left[ \left( \int dU U \rho U^\dagger \right) M^\dagger M \right]$$

, where the integration is performed over the uniform Haar measure in the space of unitaries. Using the identity

$$\int dU U X U^\dagger = \frac{\text{Tr}(X) I}{d}$$

valid for any linear operator  $X$ , for the special case of  $\rho$  pure one obtains

$$\int d\rho \text{Tr}(\rho M^\dagger M) = \frac{1}{d} \text{Tr}(M^\dagger M). \quad (11)$$

Now, rewriting  $\int d\rho \text{Tr}(\rho M^\dagger M)$  yields

$$\begin{aligned} \int dU \text{Tr}(U \rho U^\dagger M)^2 &= \\ \sum_{\substack{i,j,k,l \\ m,n,p,q}} \int dU U_{ij} U_{kl} \bar{U}_{mn} \bar{U}_{pq} \rho_{jn} \rho_{\ell q} M_{mi} M_{pk}. \end{aligned}$$

Collins, Matsumoto, and Novak[1] provide formulae to integrate polynomials of unitary matrices

$$\begin{aligned} \int_{U_d} dU U_{ij} U_{kl} \bar{U}_{mn} \bar{U}_{pq} &= \\ \frac{1}{d^2 - 1} \left[ (\delta_{im} \delta_{jn} \delta_{kp} \delta_{\ell q} + \delta_{ip} \delta_{jq} \delta_{km} \delta_{\ell n}) \right] \end{aligned}$$

$$- \frac{1}{d} (\delta_{im} \delta_{jq} \delta_{kp} \delta_{ln} + \delta_{ip} \delta_{jn} \delta_{km} \delta_{lq}) \Big], \quad (12)$$

which contracting the indices gives

$$\int d\rho |\text{Tr}(\rho M)|^2 = \frac{1}{d(d+1)} (\text{Tr}(M^\dagger M) + |\text{Tr}(M)|^2).$$

Finally subtracting (12) from (11) leads to (28) from the article.

## Supplementary Notes 2 : Higher-order effects of the collapse operators

### Supplementary Notes 2a : Complementary figure : deviation from linearity and gate dependence

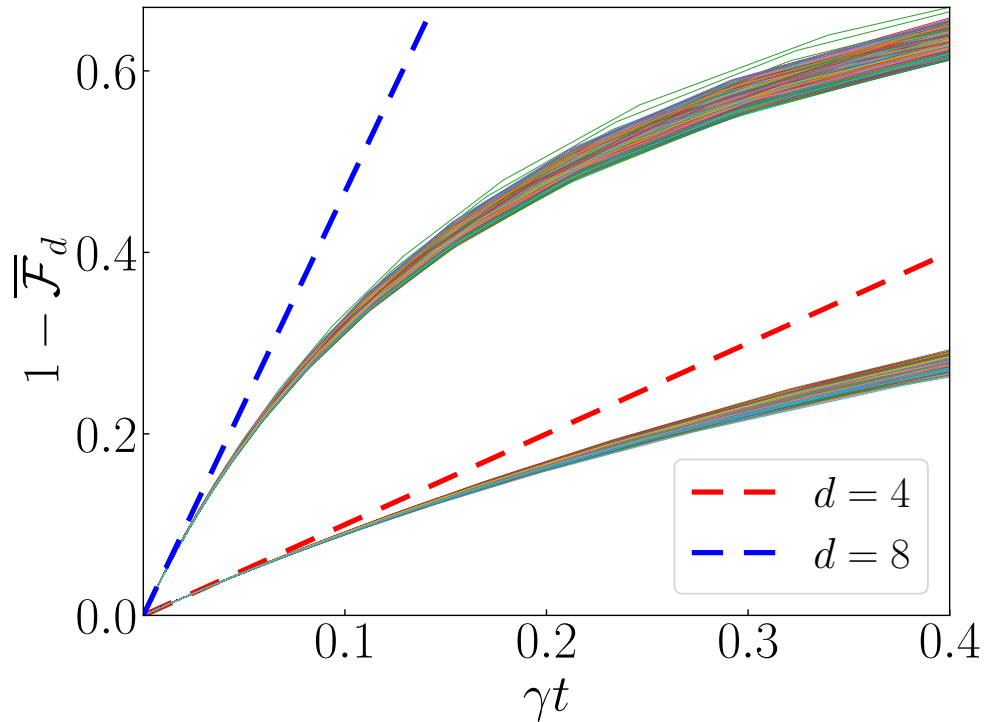

**Supplementary Figure 1** Simulated AGIs of  $N_g = 4400$  gates for  $d = 4, 8$  in solid lines. The dashed lines correspond to the expected linear behaviour at small  $\gamma t$ .

Fig.1 allows for observation of (i) the deviation from linear behaviour as  $\gamma t$  increases, (ii) for higher  $d$ , this deviation becomes noticeable for smaller values of  $\gamma t$  and, (iii) the infidelity becomes increasingly gate-dependent as  $\gamma t$  increases.

## Supplementary Notes 2b : Full expansion of the density matrix

The density matrix  $\rho(t)$  can be decomposed as

$$\rho(t) = \rho^* + \sum_{l=1} \sum_{k=1} \rho_{lk} \gamma^l t^k. \quad (13)$$

Substituting (13) in (1) from the article yields the following results:

- $\rho_{11} = \mathcal{D}[\rho^*] := \sum_k L_k \rho^* L_k^\dagger - \frac{1}{2} \{L_k^\dagger L_k, \rho^*\}$  .
- for  $l \geq 2, k = 1, \rho_{l,1} = 0$  .
- for  $l = 1, k \geq 2,$

$$k\rho_{1k} = -i[H, \rho_{1(k-1)}] - \dot{\rho}_{1(k-1)}. \quad (14)$$

- $\forall l, k \geq 2,$

$$k\rho_{lk} = -i[H, \rho_{l(k-1)}] - \dot{\rho}_{l(k-1)} + \mathcal{D}[\rho_{(l-1)(k-1)}]. \quad (15)$$

It can be linked to (3) from the article by noticing that  $M = -\rho_{11}$ .

Moreover, for  $k = l = 2$  we obtain

$$\rho_{22} = \mathcal{D}[\rho_{11}] = \mathcal{D}[\mathcal{D}[\rho^*]] . \quad (16)$$

Finally we have

$$\rho_{12} = \frac{i}{2} (\mathcal{D}[[H, \rho^*]] - [H, \rho^*]), \quad (17)$$

and

$$\rho_{13} = -\frac{i}{3} [H, \rho_{12}] - \frac{\dot{\rho}_{12}}{3}. \quad (18)$$

This gives us the following expansion

$$\rho(t) = \rho^* + \gamma \rho_{11} + \gamma^2 \rho_{12} + \gamma^3 \rho_{13} + (\gamma t)^2 \rho_{22} + \varepsilon, \quad (19)$$

with  $\varepsilon = O(\gamma^l t^k)_{l+k \geq 5}$ .

Interestingly, it can be proven by induction that if  $H = \mathbb{0}_d$  then,

$$\rho(t) = \rho^* + \sum_k (\gamma t)^k \rho_{kk}, \quad (20)$$

with  $\rho_{kk} = \frac{1}{k!} \mathcal{D}^{(k)}[\rho^*]$ .

## References

- [1] Collins, B., Matsumoto, S. & Novak, J. The Weingarten Calculus. Preprint at <https://arxiv.org/abs/2109.14890> (2021).
